# Supplementary material for: Single molecule analysis by surfaced-enhanced Raman scattering
Source: Royal Society of Chemistry journal article supplement (doi:10.1039/b709739p), 2008-01-01
Supplement: b709739p.pdf [file b709739p.pdf]

### Single Molecule Detection

| Research Group          | Substrate                | Molecule detected                                             |
|-------------------------|--------------------------|---------------------------------------------------------------|
| Kneipp <sup>1</sup>     | Silver colloids          | 1,1'-diethyl-2,2'-cyanine                                     |
| Vlckova <sup>2</sup>    | Ag nanoparticles         | 5,10,15,20-tetrakis(4-aminophenyl)porphin                     |
| Kneipp <sup>3</sup>     | Silver colloids          | Adenine                                                       |
| McGuinness <sup>4</sup> | Silver colloids          | allophycocyanin                                               |
| Aroca <sup>5</sup>      | Silver island film +(LB) | Bis (benzimidazo) thioperylene                                |
| Aroca <sup>6</sup>      | Silver island film +(LB) | bis(benzimidazo)perylene                                      |
| Aroca <sup>7</sup>      | Silver island film +(LB) | Bisbenzylimido perylene                                       |
| Zhang <sup>8</sup>      | TERRS – Au tip           | Brilliant cresyl blue                                         |
| Mandal <sup>9</sup>     | Ag/Au bimetallic         | Crystal violet                                                |
| Sharaabi <sup>10</sup>  | Silver colloids          | Crystal violet                                                |
| Kneipp <sup>11</sup>    | Silver colloids          | Crystal violet                                                |
| Bizzarri <sup>12</sup>  | Silver colloids          | Cytochrome c                                                  |
| Dickson <sup>13</sup>   | Ag clusters              | Dendrimer, peptide                                            |
| Berlin <sup>14</sup>    | Silver colloids          | Deoxyguanosine monophosphate and Deoxyadenosine monophosphate |
| Kneipp <sup>15</sup>    | Silver & gold colloids   | DNA sequence                                                  |
| Kneipp <sup>16</sup>    | Silver colloids          | Enkephalin (peptide)                                          |
| Bizzarri <sup>17</sup>  | Silver colloids          | Fe-protoporphyrin                                             |
| Bizzarri <sup>18</sup>  | Silver colloids          | Fe-protoporphyrin                                             |
| Kalkan <sup>19</sup>    | Silver nanoparticles     | Fluorescein                                                   |
| Hofkens <sup>20</sup>   | Silver colloids          | Green fluorescent protein                                     |
| Bizzarri <sup>21</sup>  | Silver colloids          | Heme myoglobin                                                |
| Kall <sup>22</sup>      | Silver colloids          | Hemoglobin                                                    |
| Bjerneld <sup>23</sup>  | Silver colloids          | Horseradish peroxidase                                        |
| Bizzarri <sup>24</sup>  | Silver colloids          | iron-protoporphyrin                                           |
| Pettinger <sup>25</sup> | STM gold tip             | Malachite green isothiocyanate                                |
| Futamata <sup>26</sup>  | Silver nanoparticles     | Malachite green, crystal violet, adenine, R6G                 |
| Aroca <sup>27</sup>     | Silver colloids          | n-(n-butyl)-n'-(4-aminobutyl) perylene                        |
| Aroca <sup>28</sup>     | Ag & Ag/Au films         | N,N'-Bis(neopentyl)-3,4,9,10-perylenebis(dicarboximide)       |
| Aroca <sup>29</sup>     | Silver island film +(LB) | N,N'-bis(phenethyl)perylene dicarboximide                     |
| Aroca <sup>30</sup>     | Silver colloids          | n-butylimidoethylenamineperylene                              |
| Aroca <sup>31</sup>     | Silver island film +(LB) | n-pentyl-5-salicylimidoperylene and octadecylrhodamine B      |
| Natelson <sup>32</sup>  | Au nanostructures        | <i>para</i> -mercaptoaniline                                  |
| Van Duyne <sup>33</sup> | Ag clusters              | Rhodamine 6G and Rhodamine 6G -d <sub>4</sub>                 |
| Nie <sup>34</sup>       | Silver colloids          | Rhodamine 6G                                                  |
| Eggeling <sup>35</sup>  | Silver colloids          | Rhodamine 6G                                                  |
| Brus <sup>36</sup>      | Silver colloids          | Rhodamine 6G                                                  |
| Nie <sup>37</sup>       | Silver colloids          | Rhodamine 6G                                                  |
| Hu <sup>38</sup>        | Silver colloids          | Rhodamine 6G                                                  |
| Futamata <sup>39</sup>  | Silver colloids          | Rhodamine 6G                                                  |
| Etchegoin <sup>40</sup> | Silver colloids          | Rhodamine 6G                                                  |

|                         |                                |                                             |
|-------------------------|--------------------------------|---------------------------------------------|
| Rowlen <sup>41</sup>    | Silver colloids                | Rhodamine 6G                                |
| Ozaki <sup>42</sup>     | Silver colloids                | Rhodamine 6G                                |
| Futamata <sup>43</sup>  | 2D array of trigonal Ag prisms | Rhodamine 6G                                |
| Zhou <sup>44</sup>      | Silver colloids                | Rhodamine 6G                                |
| Ozaki <sup>45</sup>     | Silver colloids                | Rhodamine 6G                                |
| Zhou <sup>46</sup>      | Silver colloids                | Rhodamine 6G                                |
| Futamata <sup>47</sup>  | Silver colloids                | Rhodamine 6G & DNA                          |
| Etchegoin <sup>48</sup> | Silver colloids                | Rhodamine 6G and benzotriazole              |
| Vosgroene <sup>49</sup> | Silver colloids                | Rhodamine dyes, pyronine G and thiopyronine |
| Ruan <sup>50</sup>      | Au colloids                    | Thionine                                    |

- 1 K. Kneipp, H. Kneipp, G. Deinum, I. Itzkan, R. R. Dasari, and M. S. Feld, *Appl. Spectrosc.*, 1998, **52**, 175.
- 2 B. Vlckova, I. Pavel, M. Sladkova, K. Siskova, and M. Slouf, *J. Mol. Struct.*, 2007, **834-836**, 42.
- 3 K. Kneipp, H. Kneipp, V. B. Kartha, R. Manoharan, G. Deinum, I. Itzkan, R. R. Dasari, and M. S. Feld, *Phys. Rev. E: Stat. Phys., Plasmas, Fluids.*, 1998, **57**, R6281.
- 4 C. D. McGuinness, A. M. Macmillan, J. Karolin, W. E. Smith, D. Graham, J. C. Pickup, and D. J. S. Birch, *Analyst (Cambridge, United Kingdom)*, 2007, **132**, 633.
- 5 C. J. L. Constantino, T. Lemma, P. A. Antunes, P. Goulet, and R. Aroca, *Appl. Spectrosc.*, 2003, **57**, 649.
- 6 C. J. L. Constantino, T. Lemma, P. A. Antunes, and R. Aroca, *Anal. Chem.*, 2001, **73**, 3674.
- 7 P. J. G. Goulet, N. P. W. Pieczonka, and R. F. Aroca, *Anal. Chem.*, 2003, **75**, 1918.
- 8 W. Zhang, B. S. Yeo, T. Schmid, and R. Zenobi, *J. Phys. Chem. B.*, 2007, **111**, 1733.
- 9 M. Mandal, S. Kundu, S. K. Ghosh, N. R. Jana, M. Panigrahi, and T. Pal, *Current Science*, 2004, **86**, 556.
- 10 Y. Sharaabi, T. Shegai, and G. Haran, *Chem. Phys.*, 2005, **318**, 44.
- 11 K. Kneipp, Y. Wang, H. Kneipp, L. T. Perelman, I. Itzkan, R. R. Dasari, and M. S. Feld, *Phys. Rev. Lett.*, 1997, **78**, 1667.
- 12 I. Delfino, A. R. Bizzarri, and S. Cannistraro, *Biophysical Chemistry*, 2005, **113**, 41.
- 13 L. Peyser-Capadona, J. Zheng, J. I. Gonzalez, T.-H. Lee, S. A. Patel, and R. M. Dickson, *Physical Review Letters*, 2005, **94**, 58301.
- 14 T.-W. Koo, S. Chan, and A. A. Berlin, *Opt.Lett.*, 2005, **30**, 1024.
- 15 K. Kneipp, H. Kneipp, R. R. Dasari, and M. S. Feld, *Indian Journal of Physics, B*, 2003, **77B**, 39.
- 16 K. Kneipp, H. Kneipp, S. Abdali, R. W. Berg, and H. Bohr, *Spectroscopy (Amsterdam, Netherlands)*, 2004, **18**, 433.
- 17 A. R. Bizzarri and S. Cannistraro, *Chem. Phys.*, 2003, **290**, 297.
- 18 A. R. Bizzarri and S. Cannistraro, *Topics in Applied Physics*, 2006, **103**, 279.

- 19 A. K. Kalkan and S. J. Fonash, *Appl. Phys. Lett.*, 2006, **89**, 233103/1.  
20 S. Habuchi, M. Cotlet, R. Gronheid, G. Dirix, J. Michiels, J. Vanderleyden, F. C.  
De Schryver, and J. Hofkens, *J. Am. Chem. Soc.*, 2003, **125**, 8446.  
21 A. R. Bizzarri and S. Cannistraro, *Appl. Spectrosc.*, 2002, **56**, 1531.  
22 H. Xu, E. J. Bjerneld, M. Kall, and L. Borjesson, *Phys. Rev. Lett.*, 1999, **83**, 4357.  
23 E. J. Bjerneld, Z. Foeldes-Papp, M. Kaell, and R. Rigler, *J. Phys. Chem. B.*, 2002,  
**106**, 1213.  
24 A. R. Bizzarri and S. Cannistraro, *Phys. Chem. Chem. Phys.*, 2007, **9**, 5315.  
25 K. F. Domke, D. Zhang, and B. Pettinger, *J. Am. Chem. Soc.*, 2006, **128**, 14721.  
26 M. Futamata, *Faraday Discussions*, 2006, **132**, 45.  
27 B. Tolaieb, C. J. L. Constantino, and R. F. Aroca, *Analyst (Cambridge, United  
Kingdom)*, 2004, **129**, 337.  
28 P. J. G. Goulet and R. F. Aroca, *Can. J. Anal. Sci. Spectros.*, 2007, **52**, 172.  
29 C. J. L. Constantino, T. Lemma, P. A. Antunes, and R. Aroca, *Spectrochimica  
Acta, Part A: Molecular and Biomolecular Spectroscopy*, 2002, **58A**, 403.  
30 T. Lemma and R. F. Aroca, *J. Raman Spectrosc.*, 2002, **33**, 197.  
31 P. J. G. Goulet and R. F. Aroca, *Anal. Chem.*, 2007, **79**, 2728.  
32 D. R. Ward, N. K. Grady, C. S. Levin, N. J. Halas, Y. Wu, P. Nordlander, and D.  
Natelson, *Nano Letters*, 2007, **7**, 1396.  
33 J. A. L. I. Dieringer, R. B. , K. A. Scheidt, and R. P. Van Duyne, *J. Am. Chem.  
Soc.*, 2007, **129 (51)**, 16249  
34 S. Nie and S. R. Emory, *Science (Washington, D. C.)*, 1997, **275**, 1102.  
35 C. Eggeling, J. Schaffer, C. A. M. Seidel, J. Korte, G. Brehm, S. Schneider, and  
W. Schrof, *J. Phys. Chem. A.*, 2001, **105**, 3673.  
36 K. A. Bosnick, J. Jiang, and L. E. Brus, *J. Phys. Chem. B.*, 2002, **106**, 8096.  
37 W. E. Doering and S. Nie, *J. Phys. Chem. B.*, 2002, **106**, 311.  
38 J.-w. Hu, B. Zhao, W.-q. Xu, Y.-t. Xie, Y.-g. Fan, B.-f. Li, and H. Wang,  
*Gaodeng Xuexiao Huaxue Xuebao*, 2002, **23**, 123.  
39 M. Futamata, Y. Maruyama, and M. Ishikawa, *J. Phys. Chem. B.*, 2004, **108**,  
13119.  
40 R. C. Maher, M. Dalley, E. C. Le Ru, L. F. Cohen, P. G. Etchegoin, H. Hartigan,  
R. J. C. Brown, and M. J. T. Milton, *J. Chem. Phys.*, 2004, **121**, 8901.  
41 A. A. Moore, M. L. Jacobson, N. Belabas, K. L. Rowlen, and D. M. Jonas, *J. Am.  
Chem. Soc.*, 2005, **127**, 7292.  
42 S. Sasic, T. Itoh, and Y. Ozaki, *J. Raman Spectrosc.*, 2005, **36**, 593.  
43 Y. Yamaguchi, M. Ishikawa, Y. Maruyama, and M. Futamata, *Journal of the  
Korean Physical Society*, 2005, **47**, S56.  
44 Z.-h. Zhou, L. Liu, F.-r. Xiao, G.-y. Wang, and Z.-z. Xu, *Guangpuxue Yu  
Guangpu Fenxi*, 2005, **25**, 1986.  
45 S. Sasic, T. Itoh, and Y. Ozaki, *Vibrational Spectroscopy*, 2006, **40**, 184.  
46 Z. Zhou, G. Wang, and Z. Xu, *Appl. Phys. Lett.*, 2006, **88**, 034104/1.  
47 M. Futamata, Y. Maruyama, and M. Ishikawa, *J. Mol. Struct.*, 2005, **735-736**, 75.  
48 E. C. Le Ru, M. Meyer, and P. G. Etchegoin, *J. Phys. Chem. B* 2006, **110**, 1944.  
49 T. Vosgroene and A. J. Meixner, *ChemPhysChem*, 2005, **6**, 154.  
50 C. Ruan, W. Wang, and B. Gu, *J. Raman Spectrosc.*, 2007, **38**, 568.
